# Supplementary figures and images for: sRNA-mediated activation of gene expression by inhibition of 5'-3’ exonucleolytic mRNA degradation
Source: eLife journal article supplement (doi:10.7554/elife.23602), 2017-04-24

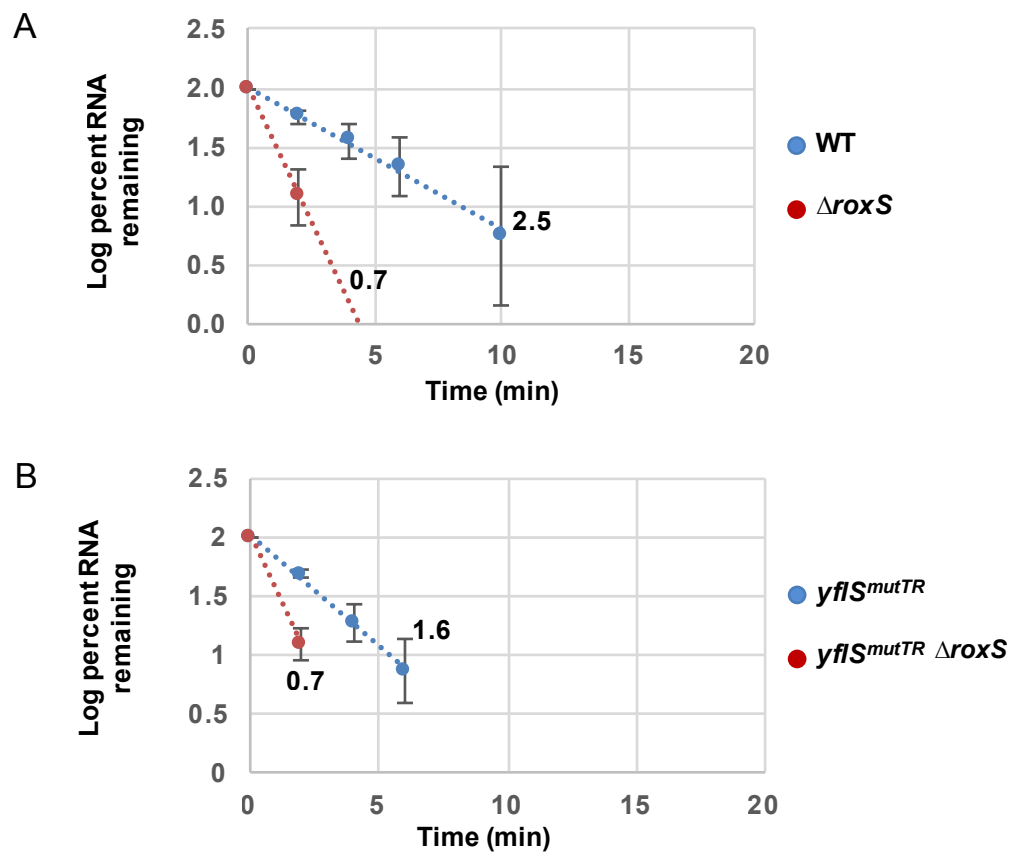

Figure 8 – Figure Supplement 1

Supplement: supp [file elife-23602-supp-v1.zip]

A

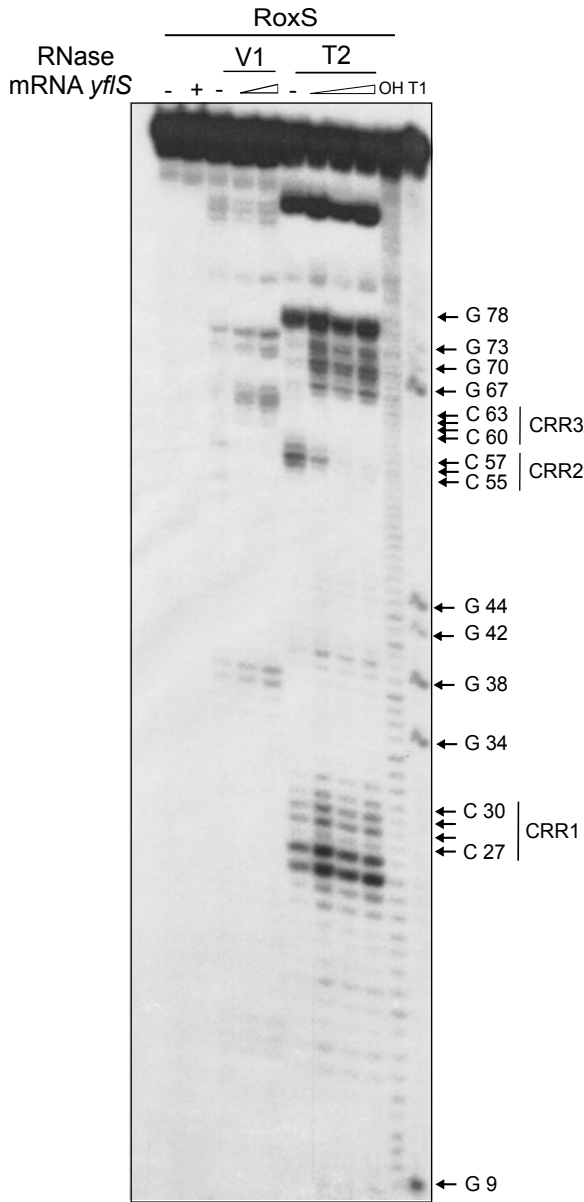

B

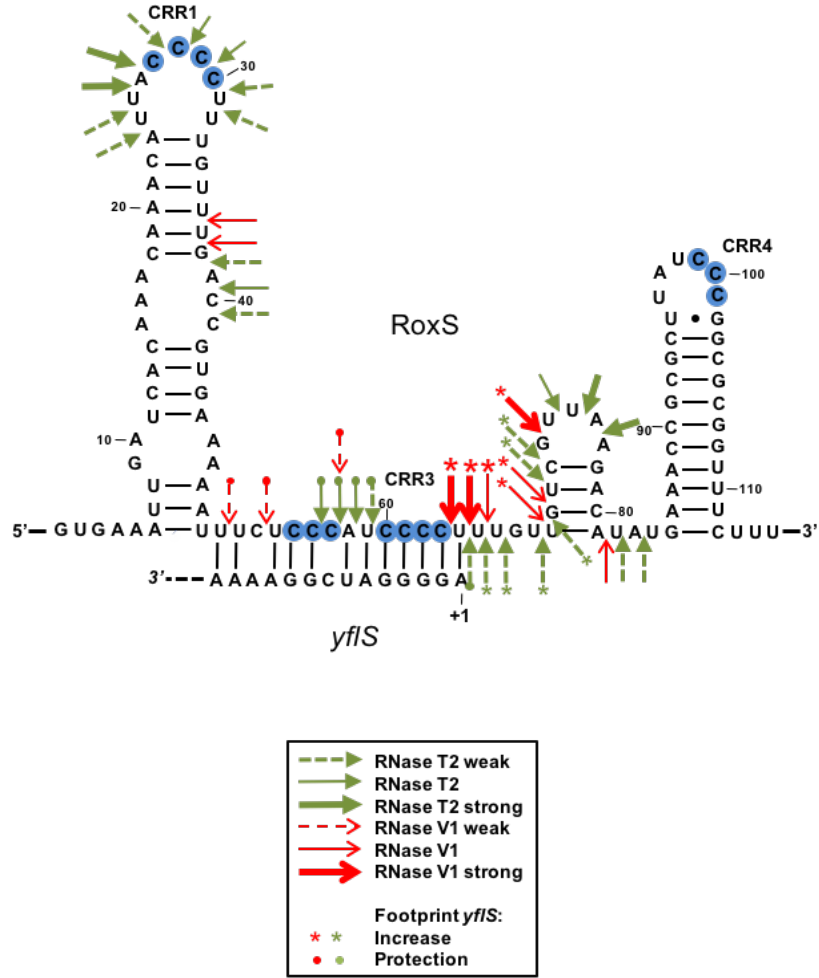

Figure 4 - Figure Supplement 1

Supplement: supp [file elife-23602-supp-v1.zip]

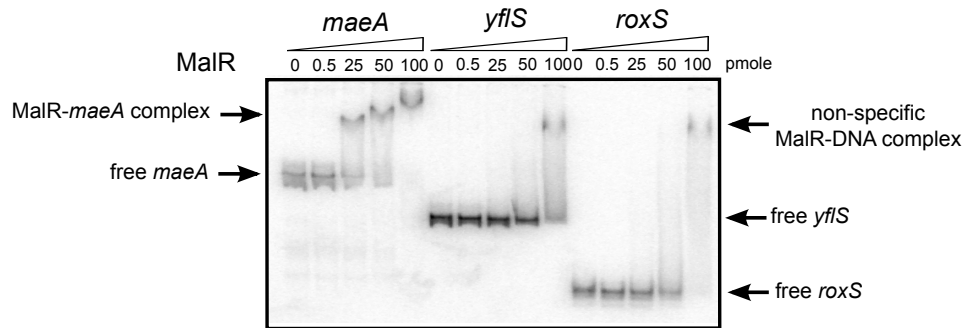

Figure 9 - Figure Supplement 1

Supplement: supp [file elife-23602-supp-v1.zip]

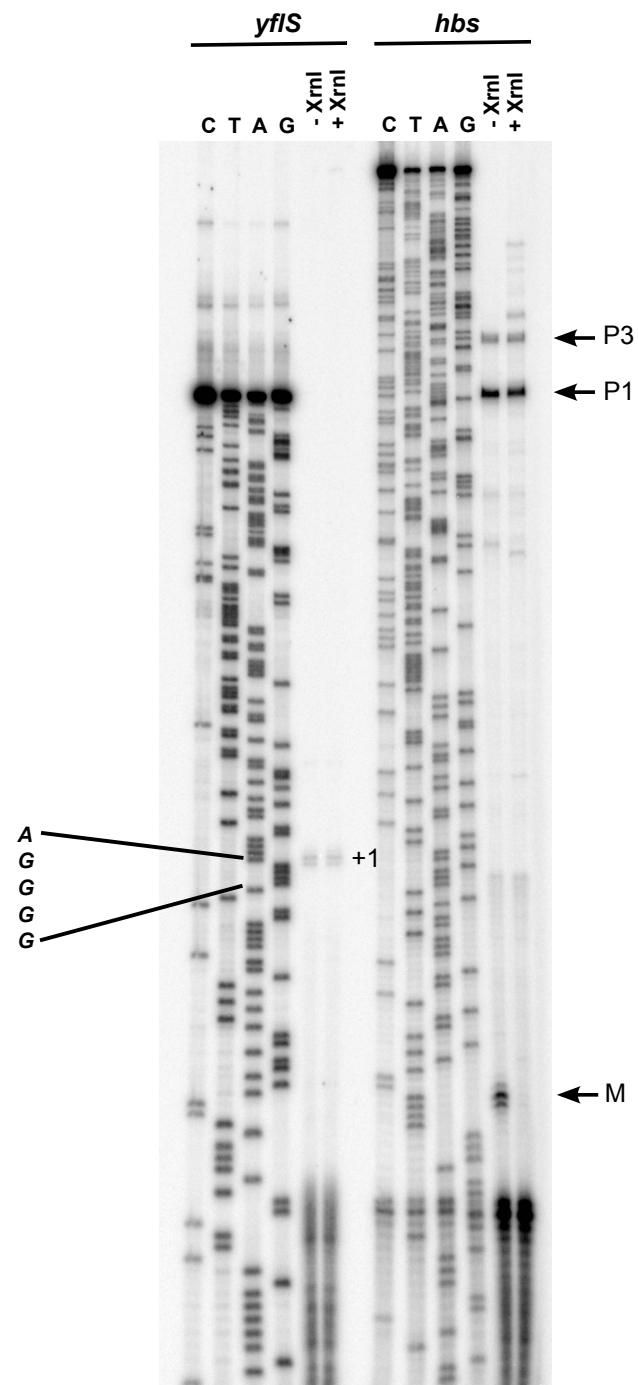

Figure 1 - Figure Supplement 1

Supplement: supp [file elife-23602-supp-v1.zip]

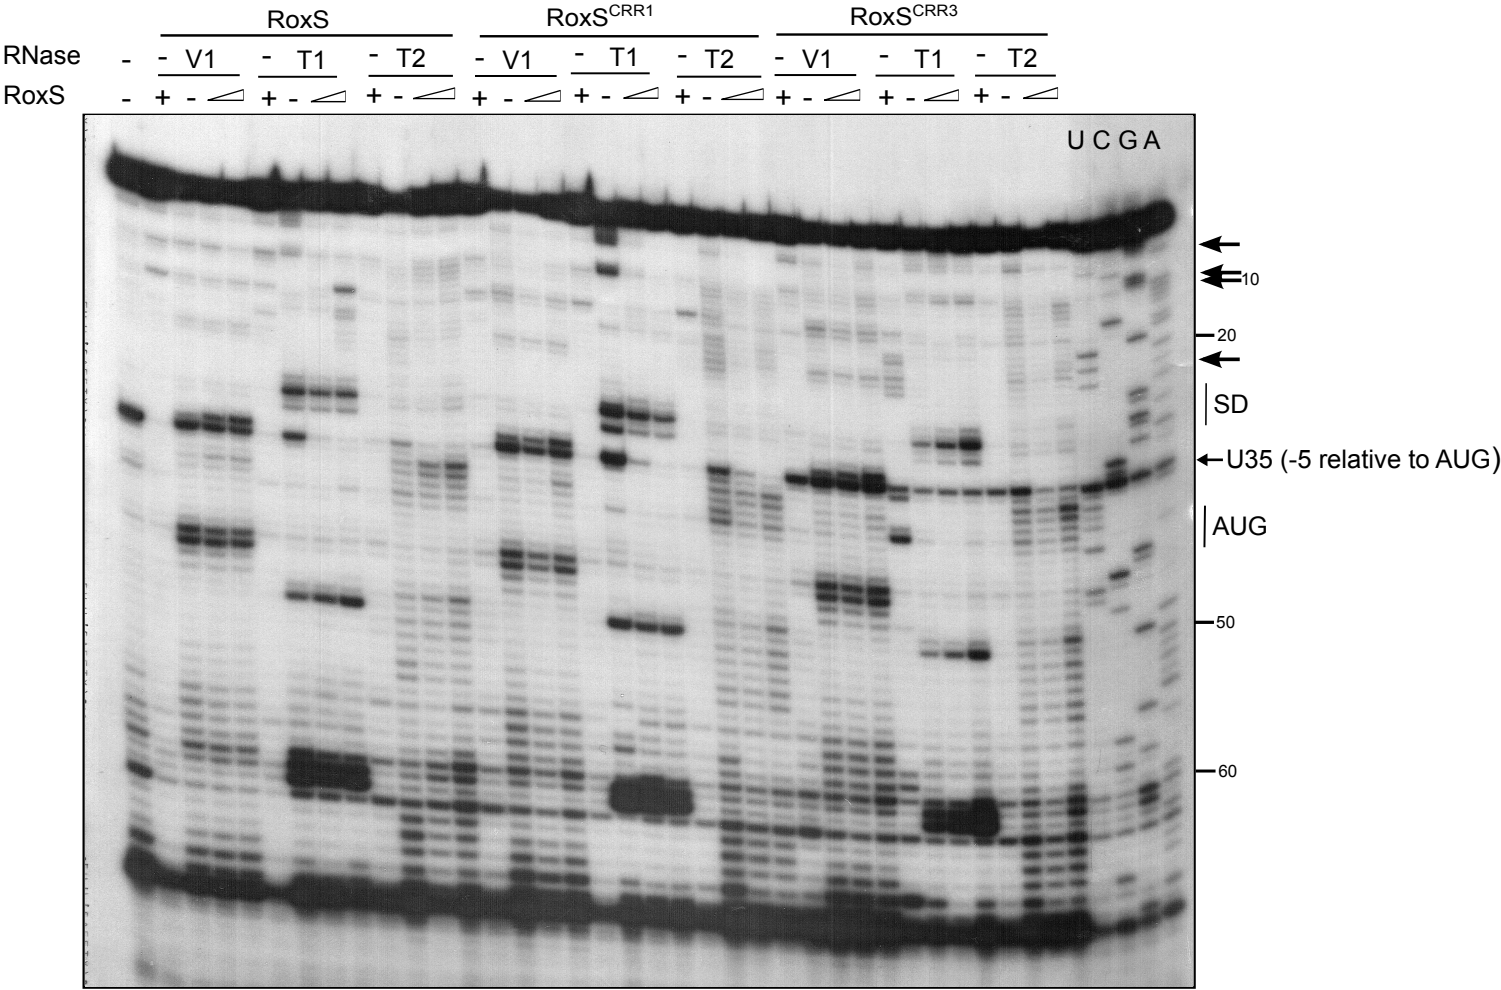

Figure 5 - Figure Supplement 1

Supplement: supp [file elife-23602-supp-v1.zip]

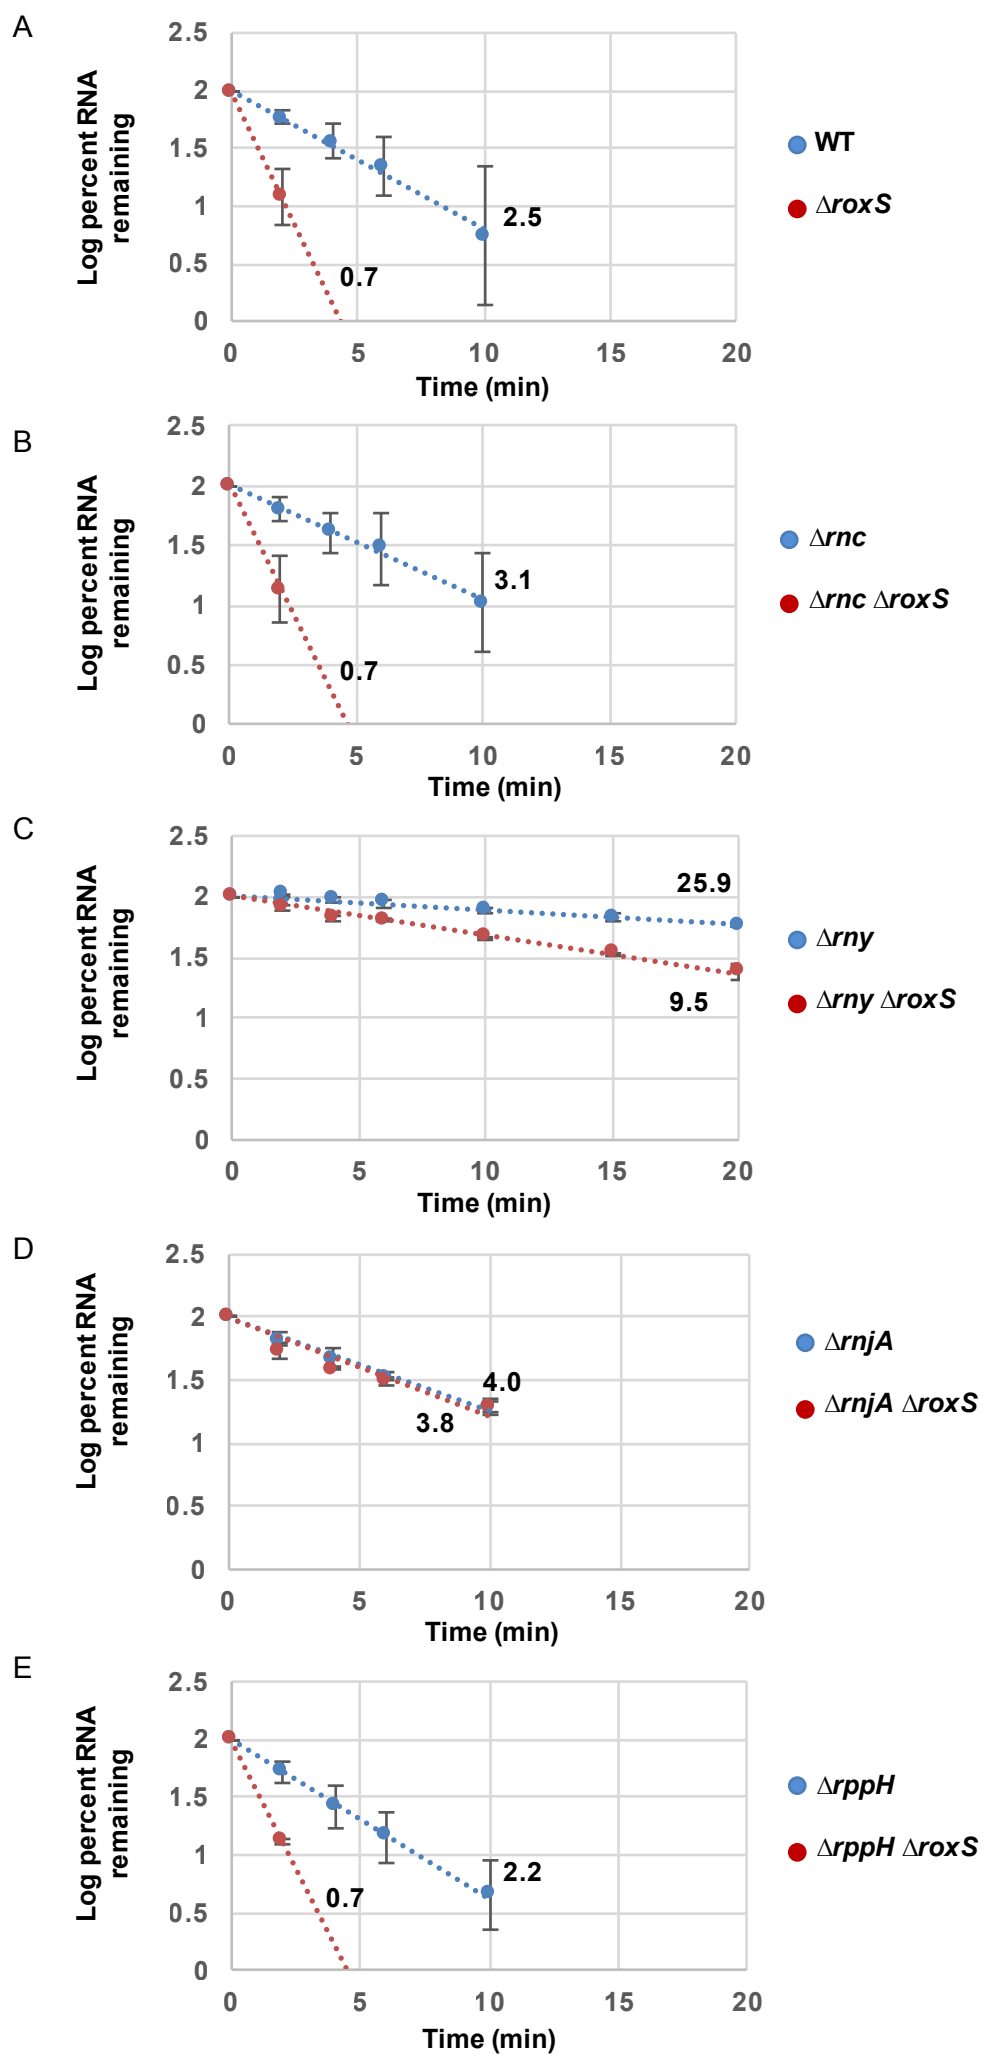

Figure 2 – Figure Supplement 1

Supplement: supp [file elife-23602-supp-v1.zip]
